# Supplementary material for: Assessment of Antioxidant and Antimicrobial Properties of Selected Greek Propolis Samples (North East Aegean Region Islands)
Source: MDPI journal article supplement (doi:10.3390/molecules27238198), 2022-11-24
Supplement: s1 [file s1]

# Assessment of Antioxidant and Antimicrobial Properties of Selected Greek Propolis Samples (North East Aegean Region Islands)

Elisavet Pyrgioti, Konstantia Graikou, Antigoni Cheilari and Ioanna Chinou \*

Lab of Pharmacognosy and Chemistry of Natural Products, Faculty of Pharmacy, National and Kapodis-trian University of Athens, 15771 Zografou, Greece

\* Correspondence: [ichinou@pharm.uoa.gr](mailto:ichinou@pharm.uoa.gr)

**Table S1.** GC-MS chemical analysis of the NEAR propolis extracts

[illegible]

[illegible]

|                                               |      |      |      |      |      |      |      |      |      |      |       |      |      |      |      |      |
|-----------------------------------------------|------|------|------|------|------|------|------|------|------|------|-------|------|------|------|------|------|
| caffeic acid ester                            |      |      |      |      |      | 0.36 |      |      |      |      |       |      |      |      |      |      |
| pentenyl-p-coumarate                          |      |      |      |      |      |      |      |      | 0.82 |      |       |      |      |      |      |      |
| linoleic acid                                 | 0.42 | 0.24 | 0.90 | 0.84 |      | 0.47 |      | 0.16 |      | 1.43 |       | 0.75 |      |      |      | 0.3  |
| oleic acid                                    | 2.20 | 1.19 | 6.14 | 4.27 | 1.13 | 2.34 | 2.40 | 0.63 | 0.87 | 6.07 | 3.12  | 5.79 | 3.34 | 1.55 | 0.89 | 0.56 |
| stearic acid                                  | 0.23 | 0.13 |      | 0.38 |      | 0.29 |      |      |      | 0.80 |       | 0.47 | 0.17 |      | 0.54 |      |
| 3-methyl-2-butenyl- ferulate                  |      |      |      |      |      |      |      |      |      |      |       |      |      |      |      | 1.73 |
| ferruginol                                    |      |      |      |      |      |      |      |      | 0.37 |      |       |      |      |      | 0.64 | 0.27 |
| sugar                                         |      |      |      |      |      |      |      |      | 1.52 |      |       |      |      |      |      |      |
| diterpene (structure similar to totarol)      |      |      |      |      |      |      |      |      |      |      |       |      |      |      | 1.01 |      |
| 2-hydroxyisocaproic acid                      | 0.43 |      |      |      |      |      |      |      |      |      |       |      |      |      |      |      |
| diterpene (structure similar to isoagatholal) |      |      |      |      |      |      |      |      |      |      |       |      |      |      | 2.88 |      |
| caffeic acid ester                            |      |      |      |      |      | 0.57 |      |      |      |      |       |      |      |      |      |      |
| sempervirol                                   |      |      |      |      |      |      |      |      |      | 0.52 |       | 0.42 |      | 1.97 |      |      |
| 14,15-dinor-13-oxo-8(17)-labden-19-oic acid   |      |      |      |      |      |      |      |      |      |      |       | 0.60 |      | 0.33 | 0.40 |      |
| diterpene                                     |      |      |      |      |      |      |      |      |      |      |       | 3.47 |      |      |      | 0.42 |
| copalol                                       |      |      |      |      |      |      |      |      |      | 0.67 |       |      |      | 0.37 | 1.49 | 0.49 |
| pimaric acid                                  | 0.49 | 0.61 | 0.68 | 0.54 |      | 0.63 | 0.85 | 0.71 | 0.46 | 1.19 | 1.88  | 2.87 | 0.26 | 0.45 | 0.76 |      |
| diterpene (structure similar to isoagatholal) |      |      |      |      |      |      |      |      |      |      |       |      |      | 2.30 |      |      |
| diterpene (structure similar to pimaric acid) |      |      |      |      |      |      |      |      |      |      |       |      |      |      | 6.72 |      |
| communic acid                                 |      |      |      |      |      |      |      |      |      |      |       |      |      |      |      | 1.79 |
| totarol                                       |      |      |      |      |      |      | 1.55 | 0.43 | 0.35 | 4.03 |       | 3.94 | 0.18 | 0.16 | 0.54 | 4.89 |
| pentenyl ferulate                             |      |      |      |      |      |      |      |      |      |      |       |      | 0.19 |      |      |      |
| diterpene (structure similar to sempervirol)  |      |      |      |      |      |      |      |      |      | 2.53 |       |      |      |      | 0.54 |      |
| isopimaric acid                               | 3.35 | 4.19 | 3.07 | 2.96 | 1.94 |      | 1.58 | 0.56 |      | 1.01 | 10.90 | 7.96 |      | 2.18 |      | 0.50 |

|                                                          |      |      |      |      |      |      |      |      |      |       |       |       |      |      |       |       |
|----------------------------------------------------------|------|------|------|------|------|------|------|------|------|-------|-------|-------|------|------|-------|-------|
| neoabietic acid                                          |      | 2.42 |      |      |      | 3.55 |      |      |      | 7.65  | 2.28  |       |      |      | 1.58  |       |
| diterpenic acid                                          | 1.10 |      |      |      |      |      |      |      |      |       |       |       |      |      |       |       |
| pimaric acid + imbricatolonic acid                       | 0.78 |      |      |      |      | 0.55 |      |      |      | 11.75 |       | 10.16 |      | 7.79 | 10.45 |       |
| 13-epitortulosol                                         |      |      |      |      |      |      |      |      |      |       |       |       |      |      |       | 1.73  |
| dehydroabietic acid                                      | 3.40 | 3.14 | 1.01 | 2.73 | 2.07 | 3.40 |      | 0.20 |      | 1.56  | 18.27 | 1.18  | 0.26 | 0.86 | 0.24  | 1.23  |
| isopentenyl caffeate                                     |      |      |      |      |      |      |      |      | 3.19 |       |       |       |      |      |       |       |
| diterpene                                                |      | 0.34 |      |      |      |      |      |      |      |       |       |       |      | 2.42 |       |       |
| 3-methyl-2-butenyl caffeate                              | 0.64 |      | 0.43 | 0.38 |      | 0.98 | 1.38 | 0.55 | 3.66 |       |       |       |      |      |       | 1.29  |
| 2-methyl-2-butenyl caffeate                              | 0.33 |      | 0.45 | 1.18 |      | 0.38 | 1.56 |      | 0.75 |       |       |       |      |      |       | 0.44  |
| 3-methyl-3-butenyl caffeate                              | 0.85 | 0.52 |      | 0.95 |      | 1.30 |      | 0.47 | 0.38 |       |       |       |      |      |       | 3.17  |
| cinnamyl cinnamate                                       |      |      |      |      |      |      |      |      |      |       |       |       |      | 1.41 |       | 2.02  |
| abietic acid                                             | 2.57 | 2.98 |      | 1.28 | 1.16 | 3.52 |      | 0.14 |      | 1.38  | 11.35 | 0.97  |      | 0.95 |       |       |
| 13 epicupressic acid                                     |      |      |      |      |      |      | 4.45 |      |      | 0.66  |       | 1.87  |      |      |       | 8.07  |
| totarolon                                                |      |      |      |      |      |      |      |      |      | 0.34  |       | 0.47  |      | 0.20 |       |       |
| isoagatholal                                             |      |      |      |      |      |      | 0.73 |      |      | 1.99  |       | 0.88  |      | 1.19 | 3.59  | 2.16  |
| pinocembrin                                              |      | 0.21 |      |      |      |      |      |      | 0.40 |       |       |       |      |      |       |       |
| 2-hydroxyferruginol                                      |      |      |      |      |      |      |      |      |      |       | 5.55  | 0.86  |      |      |       |       |
| hydroquinone                                             |      |      |      |      |      |      |      |      |      |       | 1.18  |       |      |      |       |       |
| dimethyl ether of kaempferol                             |      |      |      |      |      |      |      |      |      |       | 10.60 |       |      |      |       |       |
| triterpene                                               |      |      |      |      |      |      |      |      |      |       | 2.14  |       |      |      |       |       |
| communal                                                 |      |      |      |      |      |      |      | 0.19 |      |       |       |       |      |      |       |       |
| ferruginol                                               |      |      |      |      |      |      |      |      |      |       |       |       |      |      |       | 0.42  |
| pinocembrin chalcone                                     |      |      |      |      |      |      | 2.18 |      | 0.43 |       |       |       |      |      |       | 0.85  |
| agathadiol + imbricatolonic acid                         |      |      |      |      |      | 0.27 | 1.88 | 0.35 | 0.15 | 4.32  |       | 2.84  |      |      | 5.50  | 2.88  |
| 15-hydroxy-dehydroabietic acid                           | 0.27 |      |      |      |      | 0.47 |      |      |      |       |       |       |      |      |       |       |
| diterpene (structure similar to acetylisocupressic acid) |      |      |      |      |      |      |      |      |      |       |       |       |      |      | 0.32  |       |
| agathadiol                                               |      |      |      |      |      |      |      |      |      |       |       |       |      | 1.62 |       | 2.70  |
| isocupressic acid                                        |      |      |      |      |      | 0.84 | 8.60 | 0.19 |      | 15.62 |       | 8.58  |      | 8.26 | 7.39  | 14.08 |

[illegible]

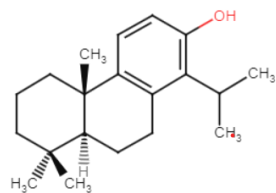

totarol

manoyl-oxide

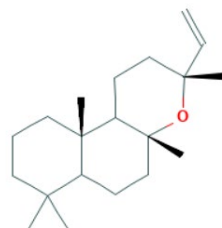

ferruginol

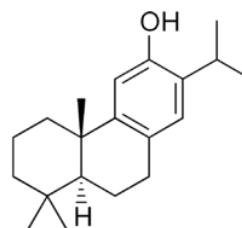

epitorulosol

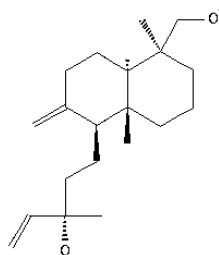

13-epitorreferol

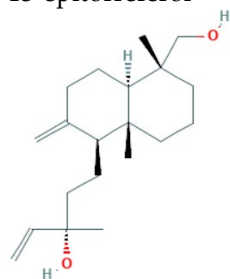

agathadiol

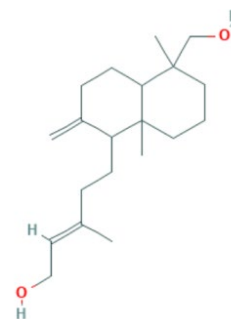

manool

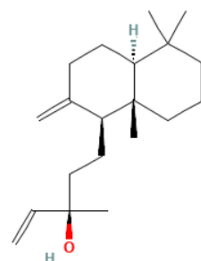

copalol

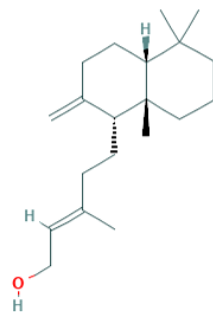

14,15-dinor-13-oxo-8(17)labden-19-oic acid

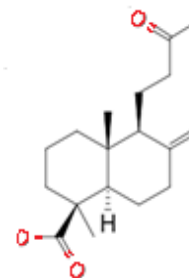

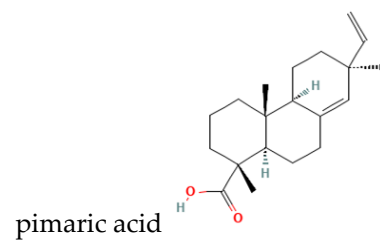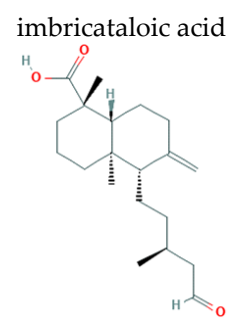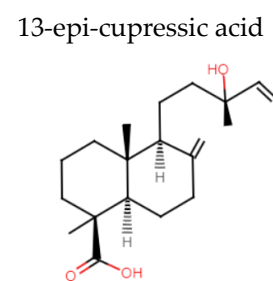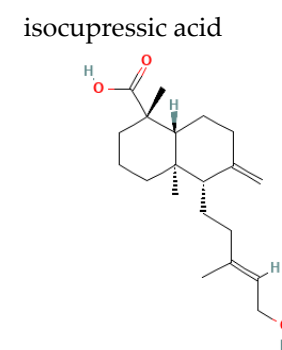

**Figure S1.** The chemical structures of the isolated compounds from NEAR propolis
